# Supplementary material for: Defects in Galactose Metabolism and Glycoconjugate Biosynthesis in a UDP-Glucose Pyrophosphorylase-Deficient Cell Line Are Reversed by Adding Galactose to the Growth Medium
Source: MDPI journal article supplement (doi:10.3390/ijms21062028), 2020-03-16
Supplement: s1 [file s1]

Supplementary Table S1: Analysis of protein N-glycosylation in UGP<sup>-</sup> and UGP<sup>+</sup> cell using lectin affinity chromatography.

|                  |        |       | RCA <sup>+,c</sup>            | Complex <sup>b</sup> | Hybrid | Polymannose | [2- <sup>3</sup> H]GP <sup>a</sup> |
|------------------|--------|-------|-------------------------------|----------------------|--------|-------------|------------------------------------|
|                  |        |       | % total [2- <sup>3</sup> H]GP |                      |        |             | cpm x 10 <sup>-5</sup>             |
| UGP <sup>+</sup> | Cells  |       | 22.7                          | 48.6                 | 11.3   | 40.1        | 5.02                               |
|                  | Medium |       | 23.0                          | 83.3                 | 8.6    | 8.2         | 1.48                               |
| UGP <sup>-</sup> | Cells  |       | 3.5                           | 35.1                 | 13.1   | 51.8        | 5.79                               |
|                  | Medium |       | 5.4                           | 70.2                 | 9.6    | 20.2        | 1.65                               |
| UGP <sup>-</sup> | Cells  | + Gal | 26.2                          | 35.6                 | 18.0   | 46.3        | 3.07                               |
|                  | Medium | + Gal | 37.7                          | 65.6                 | 24.2   | 10.2        | 1.93                               |

<sup>a</sup>Cells were radiolabelled with [2-<sup>3</sup>H]Man for 18 h as described in Materials and Methods and glycopeptides ([2-<sup>3</sup>H]GP) were prepared from the cells and media.

<sup>b</sup>Glycopeptides were subjected to ConA-Sepharose chromatography and eluted as described in Materials and Methods to yield fractions containing glycopeptides possessing complex-, hybrid- and polymannose-type N-glycans.

<sup>c</sup>Similarly, glycopeptides were loaded onto RCA-I-agarose columns. After washing the columns, bound glycopeptides (RCA<sup>+</sup>) were eluted as described in Materials and Methods.
